# Supplementary material for: Efficiency enhancement in dye-sensitized solar cells using the shape/size-dependent plasmonic nanocomposite photoanodes incorporating silver nanoplates
Source: Royal Society of Chemistry journal article supplement (doi:10.1039/c7nr01059a), 2017-01-01
Supplement: c7nr01059a1.pdf [file c7nr01059a1.pdf]

## Supplementary Information

### Efficiency enhancement in dye-sensitized solar cells using shape-dependent plasmonic nanocomposite photoanodes incorporating silver nanoplates

Hyun-Jun Hwang, Sung-Jun Joo, Supriya A. Patil, and Hak-Sung Kim

#### 1. 3D modeling for finite element analysis

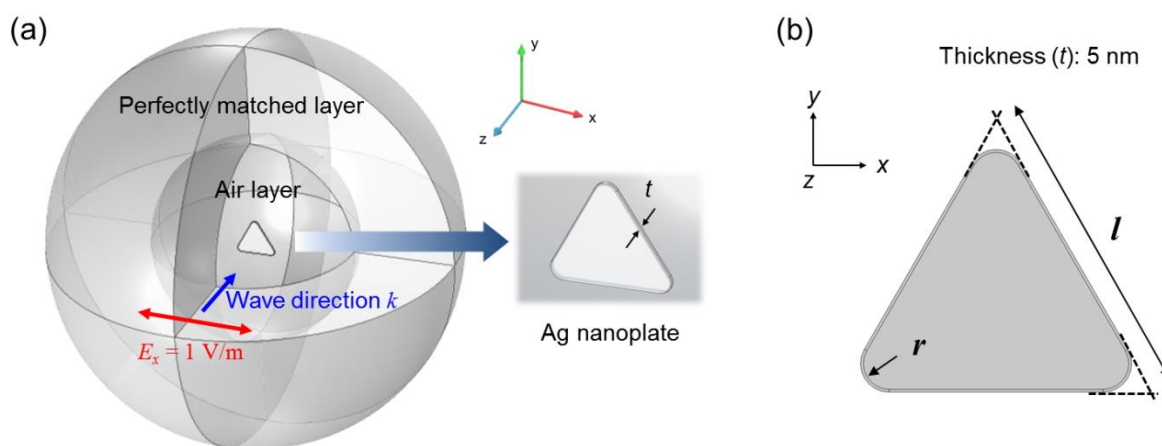

**Figure S1.** (a) 3D numerical model used for FEM analysis and (b) schematic illustration of Ag nanoplate.

A single Ag nanoplate was placed on a center surrounded by air layer. Also, perfectly matched layer (PML) was additionally modeled on air layer for prevention of backscatter from these boundaries. Radii of air layer and PML were  $\lambda/2$  and  $\lambda$  respectively, where  $\lambda$  is the incident wavelength of light. The nanoplate was set as an equilateral triangle with the side length ( $l$ ) from 60 nm to 180 nm, maintaining the thickness of 5 nm. Radius of curvature ( $r$ ) at three nanoplate corners was varied from 10 nm to 26 nm to investigate shape effect on the plasmon resonance wavelength (figure S1(b)). The

minimum mesh size was 3 nm around the nanoplate, and the maximum size of air layer was one fifth of the wavelength.

By assuming time-harmonic electric field, this model solves the electric field  $\vec{E}(r, t)$  using Maxwell's equation (1) [30]:

$$\nabla \times \mu_r^{-1} (\nabla \times \vec{E}) k_0^2 - \left( \epsilon_r - \frac{j\sigma}{\omega \epsilon_0} \right) \vec{E} = 0 \quad (1)$$

where the constants  $\mu_r$  and  $\epsilon_r$  are relative permeability and complex value of relative permittivity, respectively. The material property of Ag were obtained from Ref. [31]. The electric field (i.e. incident light) was propagated through z-direction with peak amplitude of  $E_x = 1$  V/m (see figure S1a). Using a parametric sweep analysis, wavelength  $\lambda$  was varied from 350 nm to 1100 nm. To calculate scattering energy, we used a well-known scattered field formula which is calculated by integrating Poynting vector of the scattered field over the surface of nanoplate.

## 2. Spectrum of solar radiation

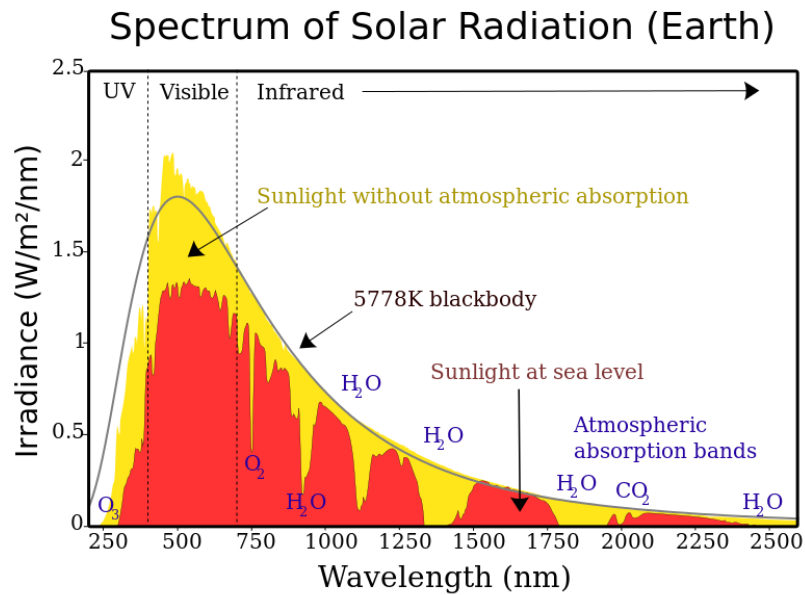

**Figure S2.** Solar irradiance spectrum above atmosphere and at surface. Extreme UV and X-rays are produced (at left of wavelength range shown) but comprise very small amounts of the Sun's total output power. (reference: Iqbal, M., "An Introduction to Solar Radiation", Academic Press (1983), Chap. 3)

### 3. Transient heat transfer analysis

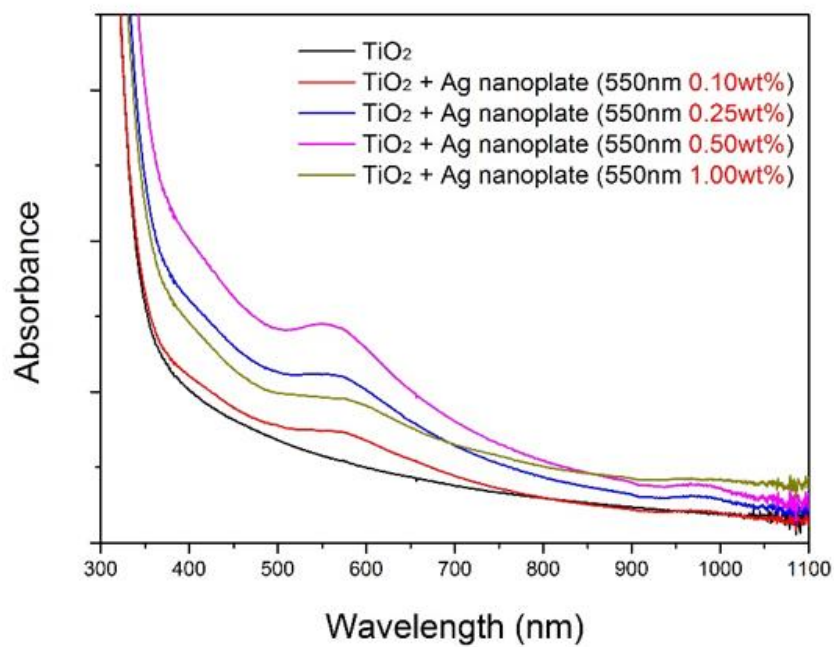

**Figure S3.** UV-vis absorbance spectra of the Ag nanoplate-incorporated plasmonic photoanodes with different weight fraction of Ag nanoplates.
